# Supplementary material
Source: Springer Nature journal article supplement (https://www.springermedizin.de/resource/supplementary/12985_2013_2302_MOESM2_ESM.pdf/9606476)

**pGL3-Bov-EGFP**

**pEGFP-N1**

**pGL3-EGFP**

**293T**

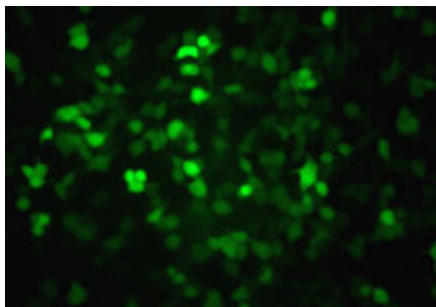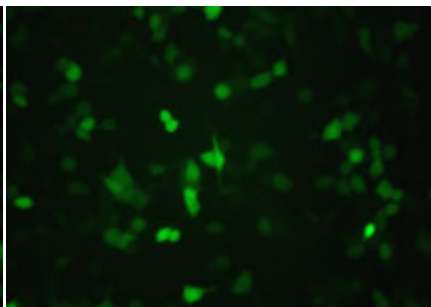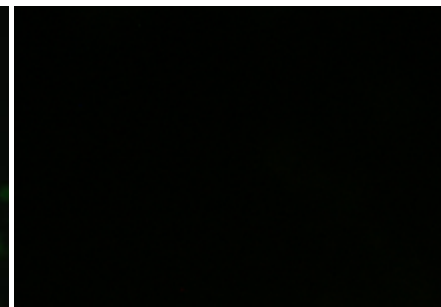

**HeLa**

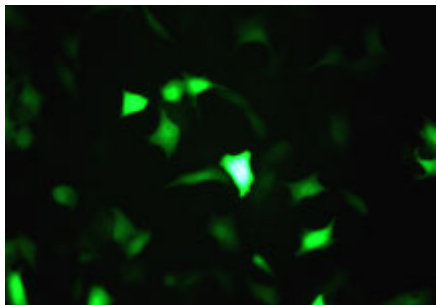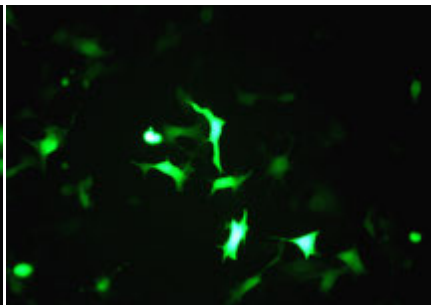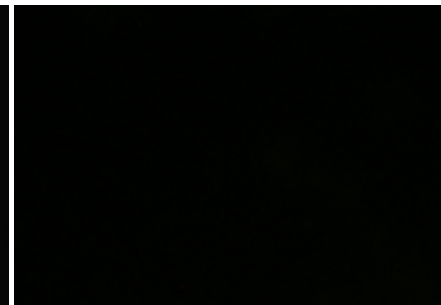

**A549**

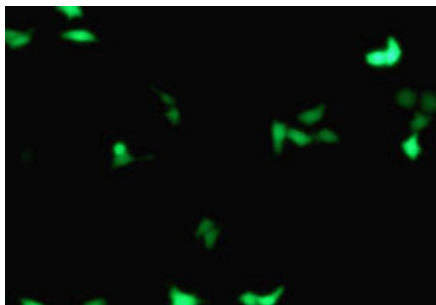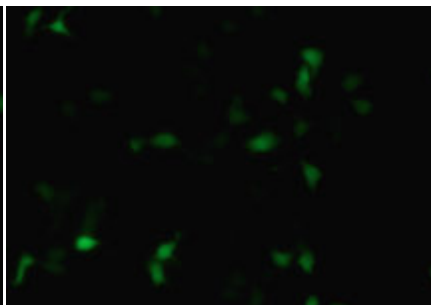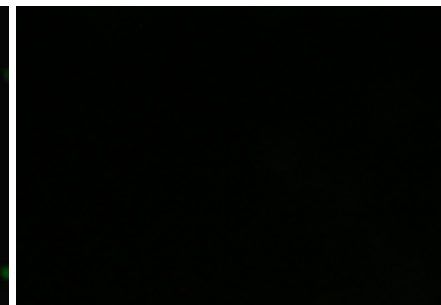

**WI-38**

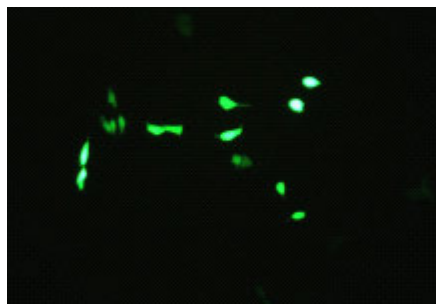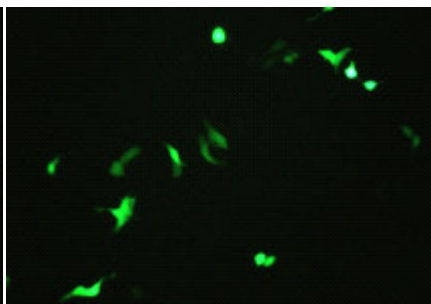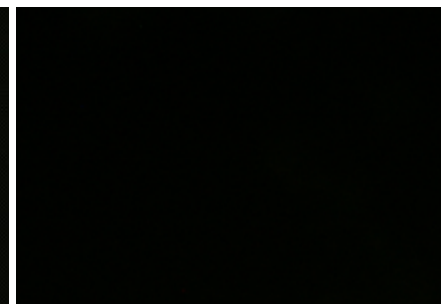

Supplement: MOESM2 [file 9606476]
